# Supplementary material for: Environmentally friendly, aqueous processed ZnO as an efficient electron transport layer for low temperature processed metal–halide perovskite photovoltaics
Source: Royal Society of Chemistry journal article supplement (doi:10.1039/c7qi00667e), 2017-11-10
Supplement: c7qi00667e1.pdf [file c7qi00667e1.pdf]

Supporting Information for

**Environmentally friendly, aqueous processed ZnO as an efficient  
electron transport layer for low temperature processed  
metal-halide perovskite photovoltaics**

Jiaqi Zhang,<sup>a</sup> Maurizio Morbidoni,<sup>a</sup> Keke Huang,<sup>b</sup> Shouhua Feng,<sup>b</sup> and Martyn A. McLachlan<sup>a,\*</sup>

<sup>a</sup> *Department of Materials and Centre for Plastic Electronics, Imperial College London, London SW7 2AZ, United Kingdom.*

*Email: martyn.mclachlan@imperial.ac.uk*

<sup>b</sup> *Department of Chemistry and State Key Laboratory of Inorganic Synthesis and Preparative Chemistry, Jilin University, Changchun 130012, P.R. China.*

**Supporting Table 1** Contact angle measurements of CH<sub>3</sub>NH<sub>3</sub>PbI<sub>3</sub> precursor droplets onto ZnO processed at the temperatures indicated

|                   | as cast    | ZnO (100 °C) | ZnO (200 °C) | ZnO (450 °C) |
|-------------------|------------|--------------|--------------|--------------|
| Contact angle (°) | 34.5 ± 6.1 | 28.4 ± 1.8   | 27.1 ± 2.8   | 7.5 ± 0.1    |

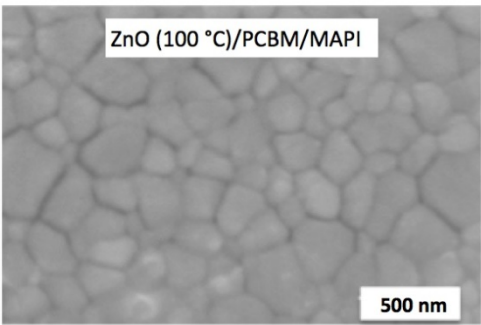

|                         | ZnO/PCBM/MAPI |
|-------------------------|---------------|
| Average Grain Size (nm) | 222.2         |
| Standard Deviation (nm) | 64.5          |

**Supporting Figure 1** SEM images of CH<sub>3</sub>NH<sub>3</sub>PbI<sub>3</sub> films on top of ZnO (100 °C)/PCBM films, showing similar perovskite grain size compared to that on top of ZnO (100 °C).
